# Supplementary material for: Subjective wellbeing at different spatial scales for individuals satisfied and dissatisfied with life
Source: PeerJ. 2019 Feb 21;7:e6502. doi: 10.7717/peerj.6502 (PMC6387756; doi:10.7717/peerj.6502)
Supplement: Supplemental Information 1 [file peerj-07-6502-s001.xlsx]

## Sheet: App. Table 1
		Subsample "All"					Subsample "Unhappy" (LS≤5)					Subsample "Happy" (LS>5)
		SA1	SA2	SA3	SA4	State	SA1	SA2	SA3	SA4	State	SA1	SA2	SA3	SA4	State
	Age (last birthday on June 30, 2016)	42.41	42.08	43.65	44.17	43.07	45.28	45.17	45.37	45.12	43.97	42.25	41.94	43.55	44.10	43.00
		(15.62)	(11.50)	(6.216)	(3.476)	(2.338)	(16.08)	(14.88)	(11.73)	(7.365)	(3.980)	(15.81)	(11.76)	(6.392)	(3.588)	(2.327)
	Male (prop. of individuals)	0.468	0.473	0.477	0.476	0.476	0.468	0.470	0.475	0.473	0.461	0.468	0.473	0.477	0.476	0.477
		(0.306)	(0.211)	(0.0902)	(0.0296)	(0.0135)	(0.464)	(0.428)	(0.327)	(0.186)	(0.105)	(0.313)	(0.220)	(0.0952)	(0.0308)	(0.0153)
	Australia born (prop. of individuals)	0.796	0.793	0.792	0.795	0.778	0.742	0.745	0.749	0.760	0.739	0.798	0.795	0.794	0.798	0.781
		(0.334)	(0.256)	(0.155)	(0.120)	(0.0616)	(0.419)	(0.391)	(0.310)	(0.213)	(0.121)	(0.335)	(0.258)	(0.154)	(0.118)	(0.0605)
	Immigrant from English speaking country (prop. of individuals)	0.0958	0.0969	0.0994	0.0965	0.109	0.0898	0.0914	0.0909	0.0890	0.0983	0.0960	0.0972	0.0998	0.0971	0.110
		(0.237)	(0.176)	(0.0935)	(0.0517)	(0.0333)	(0.271)	(0.253)	(0.194)	(0.114)	(0.0652)	(0.239)	(0.179)	(0.0943)	(0.0524)	(0.0334)
	Indigenous (aboroginal/torres strait) (prop. of individuals)	0.0214	0.0212	0.0221	0.0210	0.0201	0.0269	0.0277	0.0303	0.0303	0.0329	0.0210	0.0209	0.0214	0.0205	0.0192
		(0.125)	(0.0962)	(0.0596)	(0.0374)	(0.0219)	(0.156)	(0.148)	(0.124)	(0.0834)	(0.0441)	(0.125)	(0.0972)	(0.0586)	(0.0372)	(0.0211)
	Speaks english well (prop. of individuals)	0.983	0.982	0.979	0.978	0.982	0.940	0.943	0.942	0.943	0.955	0.985	0.984	0.981	0.980	0.983
		(0.0972)	(0.0762)	(0.0505)	(0.0399)	(0.0242)	(0.220)	(0.198)	(0.161)	(0.119)	(0.0774)	(0.0929)	(0.0725)	(0.0478)	(0.0383)	(0.0243)
	Unemployed (prop. of individuals)	0.0422	0.0418	0.0390	0.0380	0.0369	0.0848	0.0826	0.0804	0.0800	0.0793	0.0390	0.0387	0.0360	0.0349	0.0337
		(0.159)	(0.114)	(0.0532)	(0.0221)	(0.0117)	(0.265)	(0.239)	(0.180)	(0.107)	(0.0538)	(0.154)	(0.113)	(0.0513)	(0.0213)	(0.0110)
	Homeowner (prop. of individuals)	0.549	0.573	0.620	0.635	0.633	0.493	0.493	0.498	0.490	0.492	0.561	0.584	0.629	0.645	0.642
		(0.477)	(0.377)	(0.244)	(0.192)	(0.175)	(0.490)	(0.461)	(0.371)	(0.256)	(0.177)	(0.476)	(0.378)	(0.246)	(0.194)	(0.178)
	Household disposable income	76243.8	77705.9	78606.4	78866.3	83018.3	60240.3	60818.5	60632.9	59045.4	63126.2	77916.9	79095.8	79832.9	80190.8	84397.5
		-74190.9	-52142.7	-32624.7	-25525.3	-23193.7	-59005.4	-57641.8	-53624	-28153.6	-27498.3	-75034.1	-52770.6	-33266.1	-25964.5	-23355.7
	Below poverty line (prop. of individuals)	0.109	0.112	0.118	0.117	0.104	0.167	0.166	0.175	0.182	0.166	0.104	0.106	0.113	0.112	0.0992
		(0.281)	(0.223)	(0.138)	(0.0926)	(0.0788)	(0.357)	(0.329)	(0.269)	(0.182)	(0.129)	(0.275)	(0.220)	(0.137)	(0.0914)	(0.0762)
	Bachelor's or higher qualification (prop. of individuals)	0.237	0.231	0.213	0.206	0.233	0.160	0.164	0.161	0.154	0.165	0.241	0.234	0.217	0.209	0.237
		(0.354)	(0.272)	(0.168)	(0.126)	(0.0848)	(0.352)	(0.334)	(0.260)	(0.172)	(0.0769)	(0.357)	(0.276)	(0.171)	(0.127)	(0.0875)
	Hours worked at all jobs (per week)	24.58	24.66	23.90	23.44	24.67	17.42	17.72	18.14	18.34	18.78	25.02	25.08	24.30	23.81	25.07
		(17.11)	(12.99)	(7.337)	(4.250)	(4.359)	(21.11)	(19.77)	(16.09)	(10.28)	(5.837)	(17.11)	(13.05)	(7.367)	(4.233)	(4.317)
	Hours spent doing volunteer/charity work (per week)	0.955	0.979	1.035	1.059	1.084	0.823	0.837	0.816	0.842	0.809	0.965	0.988	1.049	1.073	1.098
		(2.790)	(2.110)	(0.932)	(0.425)	(0.236)	(3.543)	(3.542)	(2.383)	(1.692)	(0.749)	(2.793)	(2.117)	(0.988)	(0.440)	(0.255)
	Have 1 child (prop. of individuals)	0.131	0.141	0.142	0.141	0.145	0.139	0.138	0.139	0.135	0.156	0.132	0.141	0.142	0.141	0.144
		(0.315)	(0.246)	(0.122)	(0.0534)	(0.0282)	(0.335)	(0.308)	(0.239)	(0.137)	(0.108)	(0.317)	(0.247)	(0.125)	(0.0542)	(0.0266)
	Have 2 or more children (prop. of individuals)	0.179	0.191	0.189	0.187	0.187	0.168	0.170	0.172	0.177	0.192	0.182	0.192	0.190	0.188	0.187
		(0.360)	(0.284)	(0.143)	(0.0630)	(0.0256)	(0.362)	(0.338)	(0.265)	(0.168)	(0.118)	(0.362)	(0.286)	(0.145)	(0.0641)	(0.0254)
	In a relationship (prop. of individuals)	0.549	0.591	0.617	0.624	0.629	0.444	0.447	0.455	0.457	0.456	0.567	0.605	0.629	0.636	0.641
		(0.436)	(0.321)	(0.148)	(0.0624)	(0.0335)	(0.477)	(0.442)	(0.342)	(0.206)	(0.110)	(0.434)	(0.321)	(0.148)	(0.0631)	(0.0351)
	Separated or divorced (prop. of individuals)	0.126	0.106	0.0919	0.0881	0.0866	0.217	0.216	0.212	0.204	0.211	0.113	0.0948	0.0834	0.0798	0.0779
		(0.295)	(0.203)	(0.0836)	(0.0313)	(0.0191)	(0.395)	(0.364)	(0.277)	(0.160)	(0.0821)	(0.282)	(0.194)	(0.0820)	(0.0301)	(0.0196)
	Engages in no physical activity at all (prop. of individuals)	0.0951	0.0937	0.0957	0.0992	0.0941	0.201	0.199	0.191	0.192	0.188	0.0888	0.0869	0.0894	0.0926	0.0872
		(0.225)	(0.162)	(0.0709)	(0.0355)	(0.0221)	(0.378)	(0.346)	(0.257)	(0.149)	(0.0809)	(0.221)	(0.159)	(0.0703)	(0.0351)	(0.0214)
	Long-term health condition (prop. of individuals)	0.265	0.258	0.269	0.272	0.264	0.540	0.535	0.533	0.532	0.530	0.246	0.239	0.251	0.254	0.246
		(0.356)	(0.261)	(0.141)	(0.0808)	(0.0641)	(0.474)	(0.440)	(0.343)	(0.212)	(0.139)	(0.349)	(0.256)	(0.140)	(0.0797)	(0.0612)
	Weighted average NDVI	0.304	0.314	0.329	0.341	0.269	0.303	0.311	0.328	0.341	0.269	0.304	0.314	0.329	0.341	0.269
		(0.121)	(0.120)	(0.125)	(0.126)	(0.126)	(0.118)	(0.119)	(0.124)	(0.126)	(0.126)	(0.121)	(0.120)	(0.126)	(0.126)	(0.126)
	Any other adults present during survey (prop. of individuals)	1.681	1.657	1.638	1.622	1.635	1.688	1.687	1.686	1.674	1.666	1.673	1.652	1.635	1.619	1.633
		(0.399)	(0.309)	(0.172)	(0.104)	(0.0635)	(0.459)	(0.417)	(0.326)	(0.201)	(0.115)	(0.404)	(0.315)	(0.176)	(0.107)	(0.0667)
	Appendix table 1: Average of each objective variable used in our regression and the the standard diviation between the areas (reported in parentheses).
